# Supplementary material for: Association of thyroid hormones with the severity of chronic kidney disease: a cross-sectional observational study at Tabuk, Saudi Arabia
Source: PeerJ. 2024 Oct 28;12:e18338. doi: 10.7717/peerj.18338 (PMC11526795; doi:10.7717/peerj.18338)
Supplement: Supplemental Information 1 [file peerj-12-18338-s001.xlsx]

## Sheet: Sheet1
Sample No.	sex	Age	wt	Bp	TSH	FT4	FT3	PTH	BUN	Creatinine	Na	K
1	F	59	70	142/78	0.8	15	5.17	33.68	5.9	247	131	4.5
2	M	52	85	130/90	0.43	21	5.31	34.98	5.6	253	138	3.52
3	F	57	100	132/76	3.1	14	4.43	72.42	20.9	514	138	4.94
4	M	54	70	150/80	0.51	20	4.72	13.86	17	391	140	4.92
5	M	31	60	151/69	3.6	21	6.4	66.54	22.3	771	137	6.18
6	M	59	117	182/101	4.1	22	5.13	109.9	32	950	133	5.75
7	F	70	80	149/77	2.75	19	5.9	20.21	20	292	141	4.25			Parameter	min	max	unit
8	M	43	88	140/95	3.48	18	3.88	273.4	22.5	1326	137	5.03			TSH	0.27	4.2	µiU/ml
9	M	20	49	163/117	0.42	16	5.29	47.57	11.9	729	138	6.39			FT3	3.1	6.8	pmol/L
10	M	57	70	118/79	1.37	17	4.86	16.82	8.9	348	134	5.12			FT4	12	22	pmol/L
11	M	74	70	166/82	3.22	20	4.13	32.3	28	173	135	5.45			PTH	1.59	6.89	pmol/L
12	M	65	80	148/80	0.9	12	5.3	61.9	7.3	357	130	4.25			NA	135	152	mmoll/L
13	F	69	65	180/75	0.62	21	6.8	39.47	17.8	601	135	4.11			K	3.5	5.1	MMOL/L
14	M	58	110	152/82	1.2	18	3.5	37.41	12.3	450	134	4.28			BUN	3.2	8.2	uMOL/L
15	F	72	68	116/53	2.54	21	4.55	17.81	17.5	295	138	4.83			Creatinine	62	106	µmol/L
16	M	21	80	150/90	3.36	19	3.43	73.36	7.5	336	140	4.51
17	F	73	75	128/70	1.12	17	3.6	47.89	18.2	223	132	4.62
18	M	60	80	150/65	2.5	20	5.67	42.2	8.5	316	139	4.39
19	F	49	95	147/51	3.16	22	3.83	16.8	14	115	126	4.78
20	M	52	70	181/88	1.79	16	4.3	59.3	20.2	136	128	5.44
21	M	82	80	91/44	3.22	19	3.17	38.18	11.6	452	137	4.22
22	F	63	90	153/62	2.7	21	5.75	17.4	7.5	320.3	137	4.3
23	F	30	60	166/81	2	20	4.23	61.3	4.9	70	138	4.25
24	F	69	60	100/68	1.4	13	6.6	23.8	16.6	364	130	5.08
25	F	48	80	130/66	2.8	17	3.28	63.7	12.2	299	137	4.27
26	F	77	77	200/84	2.96	20	5.9	88.23	12.9	489.2	139	5.05.02
27	M	59	70	184/72	3.21	16	3.12	42.5	14.1	259	140	2.95
28	M	61	67	184/72	1.88	14	3.5	33.2	7.2	410	143	4.29
29	F	66	63	164/80	2.9	17	6.28	20.9	12.9	221	130	5.02
30	M	44	66	190/89	2.5	22	3.7	16.7	13.1	312	127	4.54
31	M	30	70	108/62	1.93	19	6.3	99.5	15.5	781.5	132	3.8
32	F	76	70	190/83	1.4	20	3.3	57.77	19.2	232	141	4.96
33	M	65	75	180/86	3.52	18	3.68	76.9	15.5	228	140	3.75
34	F	56	76	160/65	1.74	22	6.5	17.7	8.6	254	137	3.94
35	F	61	70	91/40	2.78	22	4	47.5	15.5	449	136	4.52
36	M	57	72	177/76	3.65	14	6.7	10.9	8.5	278	134	4.81
37	M	23	102	130/75	2.18	18	3.9	49.3	24.2	349	136	4.65
38	F	76	41	121/81	2.43	20	5.22	10.7	12.1	145	139	4.49
39	M	65	80	182/70	3.49	13	6.13	37.01	12.3	352	146	5.9
40	M	34	87	145/84	3.09	19	5.9	21.26	11.4	293	143	5.08
41	F	52	70	175/86	2.29	16	6.24	28.4	8.4	137	138	4.72
42	F	45	70	122/58	3.27	12	5.23	22.7	14	329	142	4.81
43	F	82	75	152/78	3.38	12	3.9	14.59	18.8	305	133	5.16
44	F	26	65.6	104/55	3.22	14	4.3	68.4	24	536	153	3.9
45	M	56	96	109/77	2.93	20	3.87	12	3.7	158	136	3.74
46	M	59	80	130/63	2.1	14	6.73	24.6	20.3	427	137	4.7
47	M	57	70	105/70	3.81	17	5.88	10.77	13	220	141	4.6
48	F	56	60	133/65	4.21	16	4.7	18.02	15.6	246	144	4.43
49	M	55	70	129/77	2.49	22	6.29	24.11	8.6	171	142	4.76
50	F	51	75	140/53	2.52	12	3.9	11.28	9.5	138	143	3.98
51	F	64	80	122/62	1.27	15	3.68	39.6	9.5	159	144	4.25
52	F	77	80	170/87	3,71	21	3.98	12.83	10.6	154	131	4.64
53	M	37	80	128/70	3.8	13	4.5	10.56	7.6	213	141	4.86
54	F	66	95	118/57	3	22	5.16	13.55	12.9	144	140	4.9
55	F	22	60	132/76	2.9	17	3.95	22.7	13.9	103	146	4.56
56	F	73	88	144/82	3.1	20	4.81	29.2	8.4	115	138	5.07
57	M	57	84	154/70	2.11	16	4.88	17.5	8.8	133	140	4.7
58	F	71	70	105/54	4.07	18	5	64.4	10.6	117	139	4.58
59	M	71	75	134/82	3.22	20	4.25	17.2	9.9	172	141	5.1
60	M	82	80	91/44	3.15	20	3.1	49.17	18.9	534	145	4.55
61	M	87	75	119/70	4.2	17	6.73	39.2	19.2	655	140	4.52
62	M	57	80	121/65	0.62	21	3	37.6	16.8	223	137	3.66
63	M	55	103	169/88	4.17	20	6.4	16.1	9.2	157	139	4.09
64	M	22	70	140/100	2.13	19	4.49	12.67	8.3	226	135	4.6
65	F	59	100	125/72	3.2	16	4.38	23.29	32.4	253	148	4.49
66	M	91	70	133/60	0.66	22	3.24	11.2	8.4	157	138	4.9
67	M	69	63.6	161/66	2.34	17	5.3	12.75	7.6	145	138	4.12
68	F	56	81	154/83	3.11	13	6	39.55	21.1	278	138	4.93
69	M	82	90	120/73	0.94	19	5.5	19.84	15.1	249	145	5.49
70	F	60	60	110/78	2.51	15	5.39	26.13	18.9	345	138	2.87
71	F	59	80	151/91	3.7	21	4.7	13.25	18.6	375	138	4.68
72	F	78	50	110/66	1.5	21	3.89	117.6	19.2	496	137	4.58
73	F	70	90	150/85	3.4	16	4.42	21.79	19.9	267	137	4.8
74	M	63	75	129/75	0.92	18	5.22	59.8	9.4	359	134	5
75	M	69	60	140\70	4.2	22	5.8	11.82	20.3	195.2	135	4.21
76	M	26	75	141\60	1.77	21	4.81	9.3	18.9	385.5	136	4.2
77	F	63	64.4	172\75	0.42	16	5.33	9.3	12.3	451	137	3.73
78	F	58	70	138\64	2.9	20	5.16	9.5	8.8	114	139	3.9
79	M	78	86	121\65	0.74	22	6.49	8.8	14.7	256	138	4.88
80	F	86	70	130\80	2.37	13	6.62	9.06	34.3	313	141	5.6
81	M	56	80	176\68	1.18	15	4.9	9.7	7	386	137	4.96
82	F	23	30	154\59	2.93	18	3.6	8.6	10.2	136	138	4.7
83	M	57	70	143\92	2.73	21	6.2	10.77	13	220	141	4.6
84	F	83	80	136\71	2.93	19	3.17	9.25	11.1	135	138	3.87
85	F	78	94	158\73	1.43	14	6.4	8.86	13	133	138	4.6
86	M	77	79	112/56	2.33	17	4.12	11.38	9.7	152	142	3.74
